# Supplementary material for: Spike-in enhanced phosphoproteomics uncovers synergistic signaling responses to MEK inhibition in colon cancer cells
Source: Research Square preprint supplement (doi:10.21203/rs.3.rs-4430388/v1), 2024-06-05
Supplement: Supplementary file 1 [file readme_processeddata.pdf › readme_processeddata.pdf]

Intermediate data files “Spike-in enhanced phosphoproteomics uncovers synergistic signaling responses to MEK inhibition in colon cancer cells”

This zip file contains processed data belonging to above mentioned manuscript. Raw data and DIA-NN and Maxquant output tables, as well as the spectral library can be found in the ProteomeXchange repository (PXD050961). The processed data, such as normalised precursor intensities and statistical test results that function as basis for specific figures can be found here:

*PanelGFmix\_LFDIA\_normalised.csv Processed label-free global DIA output, contains normalised precursor intensities. Used as input for statistical testing with limma. Additionally, part of these intensities is z-score normalised and depicted in Supplementary Figures 7, 8 and 9.*

*PanelGFmix\_LFDIA\_Caco2\_testResults.csv limma test results for Label-free DIA data belonging to CaCo2. Used as input for Figure 5B, and depicted in S9. Also used for Supplementary Figure 5B*

*PanelGFmix\_LFDIA\_DLD1\_testResults.csv limma test results for Label-free DIA data belonging to DLD-1. Used as input for Figure 5B, and depicted in S8. Also used for Supplementary Figure 5B*

*PanelGFmix\_LFDIA\_HCT116\_testResults.csv limma test results for Label-free DIA data belonging to DLD-1. Used as input for Figure 5B, and depicted in S7. Also used for Supplementary Figure 5B*

*PanelGFmix\_SPIEDDIA\_normalised.csv SPIED-DIA output, contains normalised precursor intensities. Used as input for statistical testing with limma. Additionally, part of these intensities is z-score normalised and depicted in Figure 4ABC, as well as Figure 4E and Supplementary Figure 6*

*PanelGFmix\_SPIEDDIA\_HCT116\_HeatmapBase.csv Figure 4A*

*PanelGFmix\_SPIEDDIA\_HCT116\_testResults.csv limma test results SPIED-DIA data HCT116*

*PanelGFmix\_SPIEDDIA\_DLD1\_HeatmapBase.csv Figure 4B*

*PanelGFmix\_SPIEDDIA\_DLD1\_testResults.csv limma test results SPIED-DIA data HCT116*

*PanelGFmix\_SPIEDDIA\_Caco2\_HeatmapBase.csv Figure 4C*

*PanelGFmix\_SPIEDDIA\_Caco2\_testResults.csv limma test results SPIED-DIA data HCT116*
